# Supplementary material for: Nicotinamide riboside is uniquely and orally bioavailable in mice and humans
Source: PubMed Central journal article supplement (PMC5062546; doi:10.1038/ncomms12948), 2016-10-10
Supplement: ncomms12948-s1.pdf [file ncomms12948-s1.pdf]

**Supplementary Figure 1. Hepatic NR, NAR, and Me2PY concentrations after gavage of NR, Nam and NA**

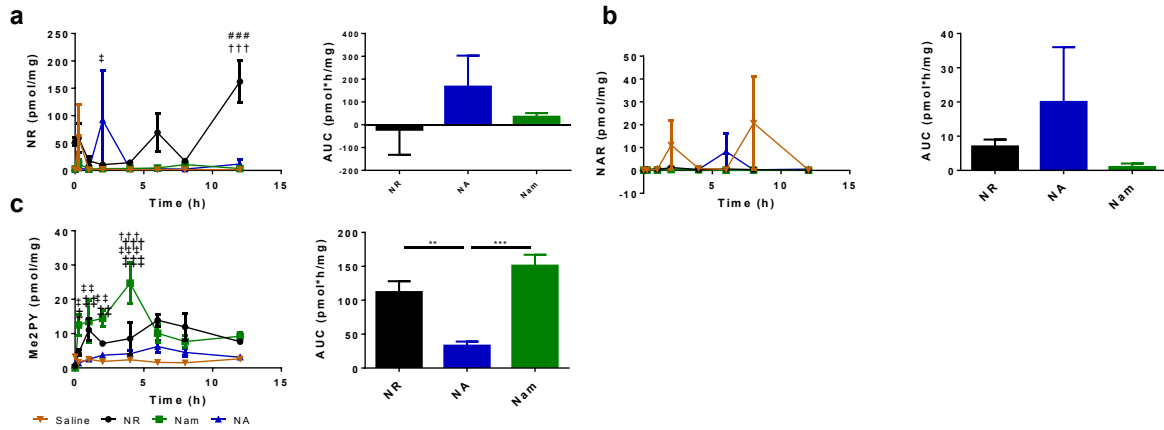

Either saline or equivalent moles of NR, NA or Nam were administered to male C57BL6/J mice by gavage. To control for circadian effects, gavage was performed at indicated times prior to a common ~2 pm sacrifice. In the left panels, the hepatic concentrations of each metabolite (pmol per mg of wet tissue weight) are shown as a function of the four gavages. In the right panels, the baseline subtracted 12-hour areas under the curve are shown. Left panels: ‡ p-value < 0.05; †† p-value < 0.01; ††† p-value < 0.001 Nam vs NA; † p-value < 0.05; †† p-value < 0.01; ††† p-value < 0.001 Nam vs NR; # p-value < 0.05; ### p-value < 0.01; #### p-value < 0.05 NA vs NR; Right panel: \* p-value < 0.05; \*\* p-value < 0.01; \*\*\* p-value < 0.001.

**Supplementary Table 1. PBMC NAD<sup>+</sup> metabolites (μM) in a 52 year-old male who orally ingested 1000 mg NR CI for 7 consecutive days**

| Time (hr) | NAD <sup>+</sup> | NADP <sup>+</sup> | NaAD  | NMN  | ADPR | Nam | MeNam | Me4PY | Me2PY |
|-----------|------------------|-------------------|-------|------|------|-----|-------|-------|-------|
| 0         | 12               | 9.1               | <0.02 | 0.68 | 0.70 | 3.2 | 0.06  | 0.20  | 1.1   |
| 0.3       | 27               | 23                | <0.02 | 1.8  | 3.3  | 4.5 | 0.14  | 0.44  | 2.2   |
| 0.6       | 17               | 13                | <0.02 | 1.4  | 2.1  | 7.1 | 0.08  | 0.57  | 3.1   |
| 1         | 24               | 13                | <0.02 | 1.3  | 1.3  | 3.2 | 0.20  | 0.59  | 3.4   |
| 1.4       | 19               | 11                | <0.02 | 1.1  | 1.3  | 3.7 | 0.15  | 0.64  | 3.1   |
| 2.7       | 12               | 6.9               | <0.02 | 0.77 | 0.85 | 2.9 | 0.13  | 0.53  | 2.8   |
| 4.1       | 42               | 27                | <0.02 | 2.7  | 3.4  | 4.9 | 0.32  | 1.9   | 11    |
| 7.7       | 43               | 27                | 0.51  | 2.6  | 2.5  | 5.9 | 0.49  | 3.5   | 17    |
| 8.1       | 50               | 33                | 0.91  | 2.9  | 3.5  | 5.7 | 0.60  | 4.4   | 22    |
| 23.8      | 32               | 17                | 0.37  | 1.9  | 2.5  | 2.6 | 0.25  | 1.9   | 8.8   |
| 167.6     | 38               | 12                | 0.45  | 1.1  | 2.1  | 3.2 | 0.66  | 2.5   | 11    |

**Supplementary Table 2. Plasma NAD<sup>+</sup> metabolites (μM) in a 52 year-old male who orally ingested 1000 mg NR CI for 7 consecutive days**

| Time (hr) | Nam  | MeNam | Me4PY | Me2PY |
|-----------|------|-------|-------|-------|
| 0         | 0.70 | 0.10  | 0.60  | 2.2   |
| 0.6       | 0.90 | 0.40  | 1.1   | 5.7   |
| 1         | 1.2  | 0.60  | 1.4   | 5.7   |
| 1.4       | 1.1  | 0.50  | 1.4   | 6.6   |
| 2.7       | 0.90 | 0.60  | 1.8   | 7.5   |
| 4.1       | 1.2  | 0.80  | 2.6   | 10    |
| 7.7       | 1.1  | 0.70  | 3.2   | 13    |
| 8.1       | 0.60 | 0.90  | 3.8   | 14    |
| 23.8      | 0.80 | 0.90  | 3.9   | 14    |
| 167.6     | 1.5  | 2.1   | 4.6   | 17    |

**Supplementary Table 3. Urinary NAD<sup>+</sup> metabolites (μmol/mmol creatinine) in a 52 year-old male who orally ingested 1000 mg NR CI for 7 consecutive days**

| Time (hr)                | Nam  | MeNam | Me4PY | Me2PY |
|--------------------------|------|-------|-------|-------|
| Pre-1 <sup>st</sup> dose | 0.26 | 5.5   | 2.8   | 13    |
| 0 - 4.1                  | 0.16 | 6.5   | 3.8   | 20    |
| 4.1 - 7.7                | 2.9  | 26    | 21    | 180   |
| 8.1 - 12                 | 1.8  | 26    | 24    | 99    |
| Pre-2 <sup>nd</sup> dose | 1.4  | 29    | 29    | 108   |
| Pre-5 <sup>th</sup> dose | 1.2  | 30    | 24    | 80    |

**Supplementary Table 4. NAD<sup>+</sup> Metabolite AUC Increases as a Function of Single Doses of NR**

| Metabolite       | NR Dose (mg) | AUC Increase from Baseline (%) |      |    | Comparison (Tukey Test) |            |
|------------------|--------------|--------------------------------|------|----|-------------------------|------------|
|                  |              | Mean                           | SEM  | N  | vs. 100 mg              | vs. 300 mg |
| NMN              | 100          | 13                             | 14   | 8  |                         |            |
|                  | 300          | 47                             | 38   | 10 | ns                      |            |
|                  | 1000         | 23                             | 15   | 8  | ns                      | ns         |
| NAD <sup>+</sup> | 100          | 48                             | 15   | 12 |                         |            |
|                  | 300          | 59                             | 40   | 12 | ns                      |            |
|                  | 1000         | 92                             | 49   | 12 | ns                      | ns         |
| Nam              | 100          | 14                             | 7    | 12 |                         |            |
|                  | 300          | 19                             | 21   | 12 | ns                      |            |
|                  | 1000         | 16                             | 10   | 12 | ns                      | ns         |
| MeNam            | 100          | 12                             | 20   | 9  |                         |            |
|                  | 300          | 63                             | 22   | 11 | ns                      |            |
|                  | 1000         | 231                            | 42   | 9  | ***                     | **         |
| me2PY            | 100          | 53                             | 14   | 10 |                         |            |
|                  | 300          | 201                            | 88   | 9  | ns                      |            |
|                  | 1000         | 609                            | 146  | 9  | **                      | *          |
| NAAD             | 100          | 705                            | 323  | 10 |                         |            |
|                  | 300          | 1287                           | 480  | 10 | ns                      |            |
|                  | 1000         | 2873                           | 1250 | 10 | *                       | ns         |

\* P < 0.05, \*\* P < 0.01, \*\*\* P < 0.001
